# Supplementary material
Source: PubMed Central journal article supplement (PMC7656281)
Supplement: jama-e2017195-s001.pdf [file jama-e2017195-s001.pdf]

## Supplemental Online Content

Malički M, Jerončić A, ter Riet G, et al. Preprint servers' policies, submission requirements, and transparency in reporting and research integrity recommendations. *JAMA*. Published November 10, 2020.  
doi:10.1001/jama.2020.17195

### **eAppendix.** Preprint Servers Identification and Topic Selection Process

This supplemental material has been provided by the authors to give readers additional information about their work.

## eAppendix. Preprint Servers Identification and Topic Selection Process

### Server identification

To the best of our knowledge, no established list or a database of all existing preprint servers exists, and so we compiled our list using Martyn Rittman's list,<sup>1</sup> ASAPbio list,<sup>2</sup> Wikipedia list of preprint servers,<sup>3</sup> existing StackExchange thread,<sup>4</sup> and personal knowledge. We additionally excluded all servers, platforms or institutional repositories that: 1) limit the ability to deposit preprints only to researchers that received funding from a specific source or had a specific institutional affiliation (e.g. AAS or Wellcome Open Research); 2) actively seek out peer review or function only as "in-review" or first look services (e.g. F1000 Research, Cell Press Sneak Peek, Springer Nature In Review); 3) do not have search options for listing of preprints (e.g. ResearchGate); or 4) no longer accept preprints (e.g. Peer J preprints, Cogprints). Identified servers are shown in Table 1 of the article and in our raw data file.

### Topic selection

In our previous study we analysed addressing of 19 transparency in reporting and research integrity topics across all disciplines using a representative sample of *Scopus*-indexed journals.<sup>5</sup> We selected those topics based on consultations with our project advisors and the results of our systematic review of 153 studies that analysed journals' *Instructions to Authors*.<sup>6</sup> Sixteen of those 19 topics (excluding peer review type, policies toward posting preprints, and shared authorship) we decided to include in the current study of preprint servers, and we added two more: authorship recommendations (to go beyond just shared authorship we covered previously) and patenting recommendations. We also added seven policy topics and six submission requirements. These additional topics and requirements were chosen as some were unique to the culture of preprinting., while others aligned with our research interests and were previously explored in journals' *Instructions to Authors*. We acknowledge that our selection is not all-encompassing, and in Table 2 of the article we present our findings in the order of frequency that they are explicitly mentioned on preprint servers' websites or submission systems, and not by any perceived importance that they may have on the ease of submitting preprints or safeguarding integrity and the transparency of science.

## eReferences

1. Rittman M. Preprint Servers. Accessed Aug 12, 2020. Google Docs [link](#).
2. ASAPbio. Surveying the landscape of products and services for sharing preprints. Accessed Aug 12, 2020. Available at: <https://asapbio.org/preprint-products>
3. Wikipedia contributors. Preprint. Wikipedia, The Free Encyclopedia. Accessed Aug 12, 2020. Available at: <https://en.wikipedia.org/w/index.php?title=Preprint&oldid=968034997>.
4. Stack Exchange community. Accessed Aug 12, 2020. Available at: <https://academia.stackexchange.com/questions/84/preprint-services-other-than-arxiv-for-other-fields>.
5. Malicki M, Aalbersberg IJJ, Bouter L, Ter Riet G. Journals' instructions to authors: A cross-sectional study across scientific disciplines. *PLOS One*. 2019;14(9):e0222157. doi: [10.1371/journal.pone.0222157](https://doi.org/10.1371/journal.pone.0222157).
6. Malički M, ter Riet G, Bouter LM, Aalbersberg IJJ. Project: Fostering Transparent and Responsible Conduct of Research: What can Journals do? Mendeley Data. Published online Aug 1, 2019. doi: [10.17632/53cskwwpdn.4](https://doi.org/10.17632/53cskwwpdn.4).
